# Supplementary material
Source: publisher figshare collection journal article supplement (https://diabetesjournals.figshare.com/ndownloader/files/39011558)
Supplement: Supplementary file 1 [file 39011558]

**Supplementary Figure S1.** School Nurse Survey


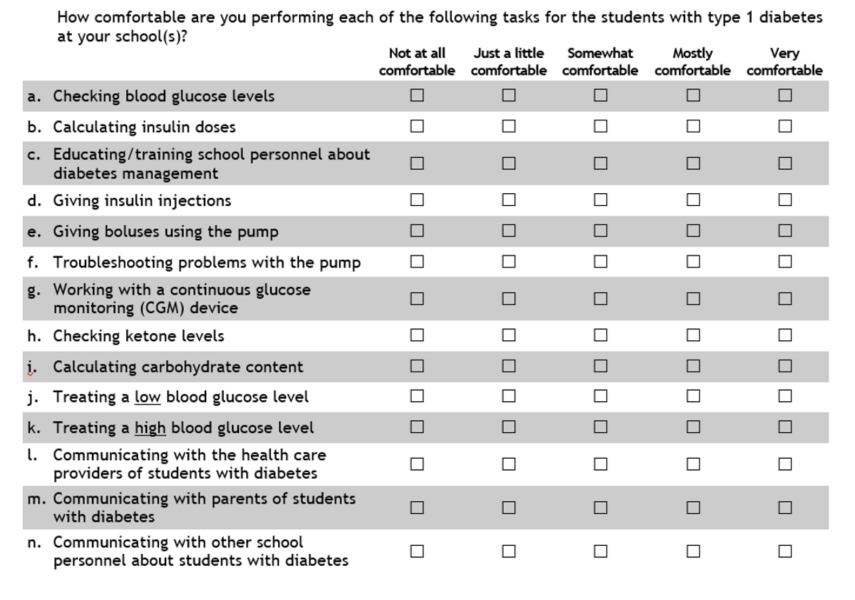


**Supplementary Table S1.** Educational content of School Nurse Program

| **Program** | **Topic** | **Presenter** |
| --- | --- | --- |
| General Diabetes Education | Etiology and pathophysiology of type 1 and type 2 diabetes in youth | MD |
| *(2 sessions/year)* | Current treatment plans and diabetes management tools for children and adolescents in the school setting | RN/NP |
|  | The role of food and nutrition in the management of diabetes | RD |
|  | What is optimal diabetes management and future opportunities | MD/NP/RN |
|  | Breakout Sessions (each participant selected 3 sessions to attend) |  |
|  | Food at school | RD |
|  | School planning 101 | RN/NP |
|  | Insulin pumps, meters and other technology | RN/NP |
|  | Troubleshooting challenging situations | MSW/PhD |
|  | Two perspectives: Q&A with a clinicians and a parent of a child with diabetes | MD/PhD/Parent |
|  | Type 2 diabetes and obesity in children | RD/RN/NP |
|  |  |  |
| Insulin Pump Education | Introduction to pump therapy | RN/NP |
| *(1 session/year)* | Realities of pump therapy in youth | MD |
|  | Carbohydrate counting and insulin dose calculations with the pump | RD |
|  | Troubleshooting the pump | RN/NP |
|  | Other diabetes technology: continuous glucose monitoring (CGM) | RN/NP |
|  | Pump readiness | MSW/PhD |
|  | Breakout Sessions (participants attended all sessions) |  |
|  | Pump basics | RN/NP |
|  | Does insulin pump therapy improve clinical outcomes? | RD/RN/NP |
|  | Advanced insulin pump dosing strategies | RN/NP |
|  | Managing exercise using an insulin pump | RN/NP |

MD: Physician, RN: Nurse, NP: Nurse Practitioner, RD: Registered Dietician, MSW: Social Worker, PhD: Psychologist
